# Supplementary material for: Self-assembly of four generations of RNA dendrimers for drug shielding with controllable layer-by-layer release
Source: Royal Society of Chemistry journal article supplement (doi:10.1039/d0nr02614j), 2020-01-01
Supplement: d0nr02614j1.pdf [file d0nr02614j1.pdf]

## Supporting Information

### Self-Assembly of Four Generations of RNA Dendrimers for Drug Shielding with Controllable Layer-by-Layer Release

Xin Li<sup>1,2</sup>, Dr. Mario Vieweger<sup>1,2</sup>, Dr. Peixuan Guo<sup>1,2,3,4,5\*</sup>

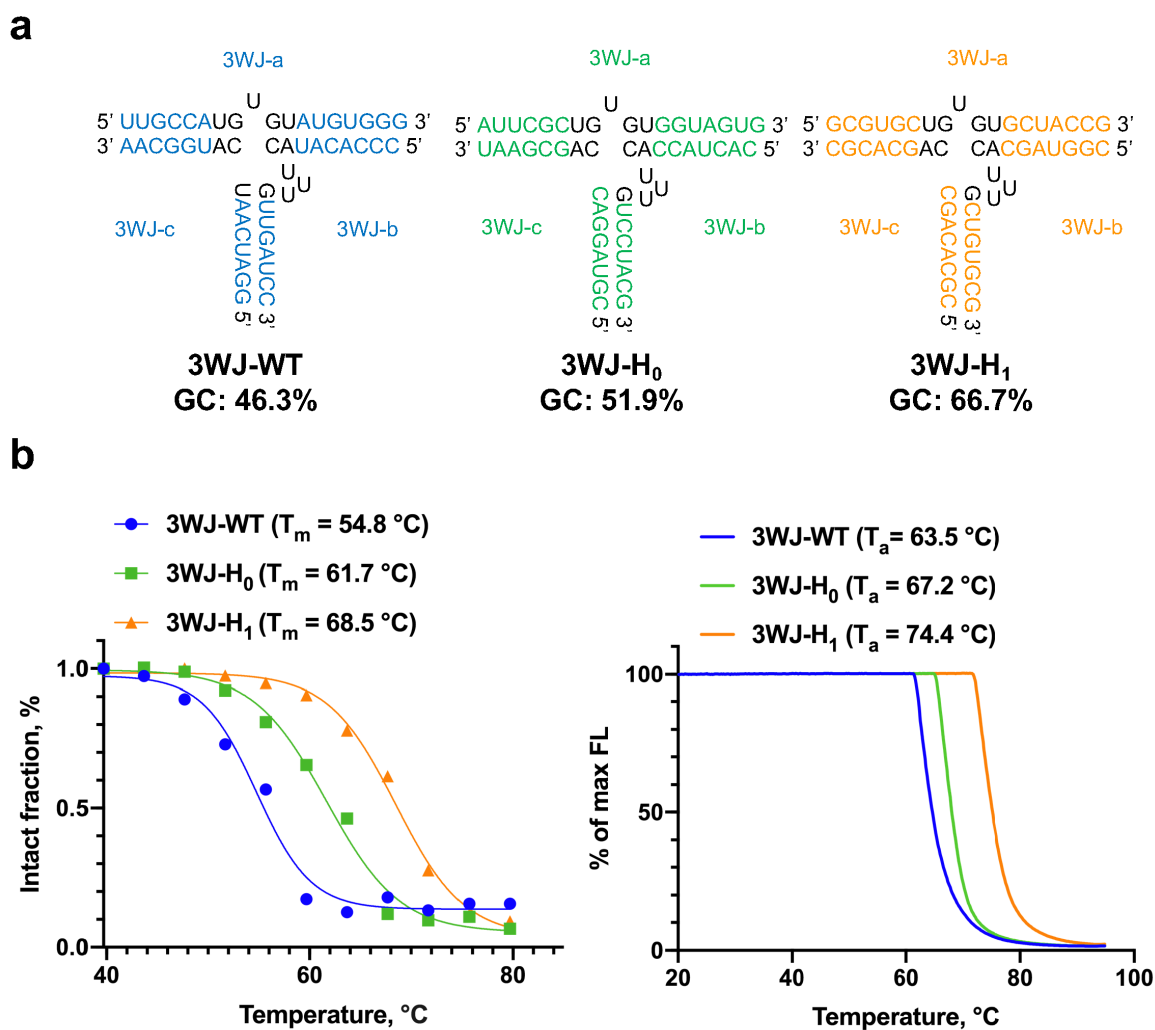

**Figure S1.** Sequence design and thermostability of new 3WJs. a) Sequence design and GC content of 3WJs, 3WJ-WT, 3WJ-H<sub>0</sub> and 3WJ-H<sub>1</sub>. b) Thermostability evaluation of 3WJs including melting and annealing curve.

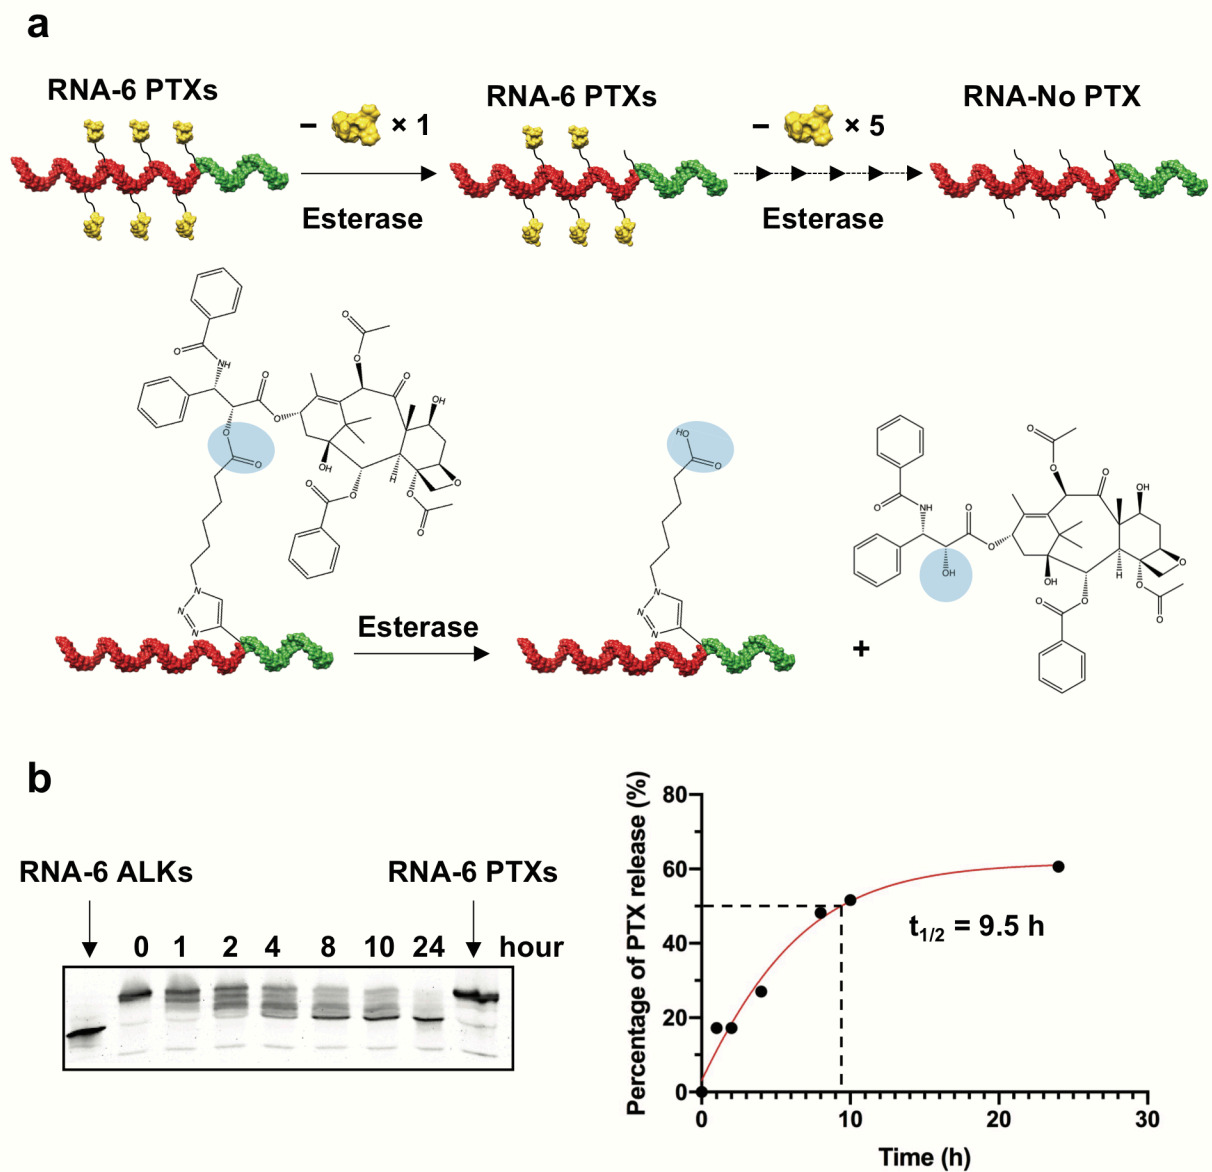

**Figure S2.** Paclitaxel release from RNA strands. a) Schematics of PTX release from RNA strands by esterase hydrolysis. b) Release profile of RNA-6 PTXs strands in 50% FBS for up to 24 h.

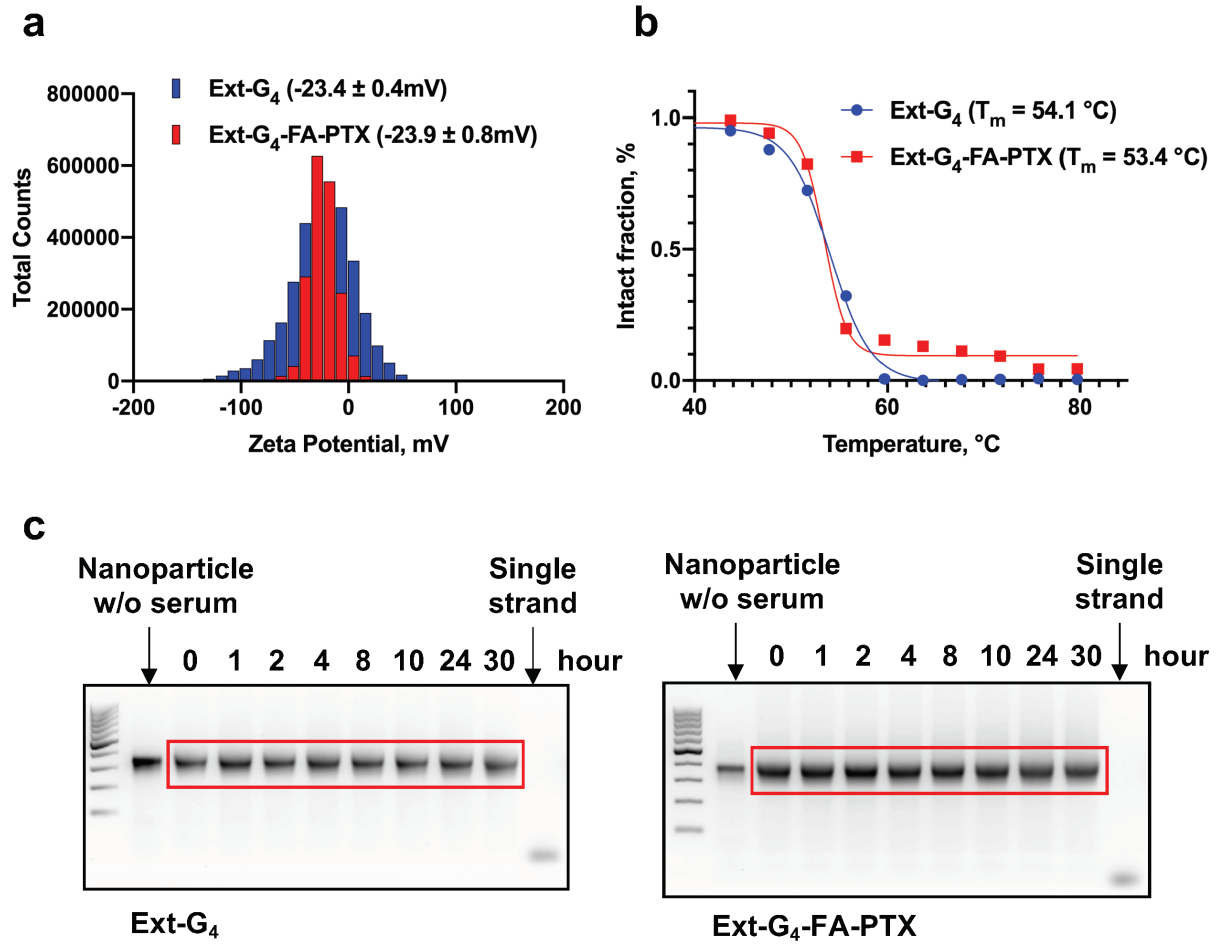

**Figure S3.** Characterizations of Ext-G<sub>4</sub>-FA-PTX RNA dendrimers (a) Zeta potential measurement (mean ± SD), (b) Thermal stability assay and (c) Enzymatic stability assay of Ext-G<sub>4</sub> and Ext-G<sub>4</sub>-FA-PTX RNA dendrimers.

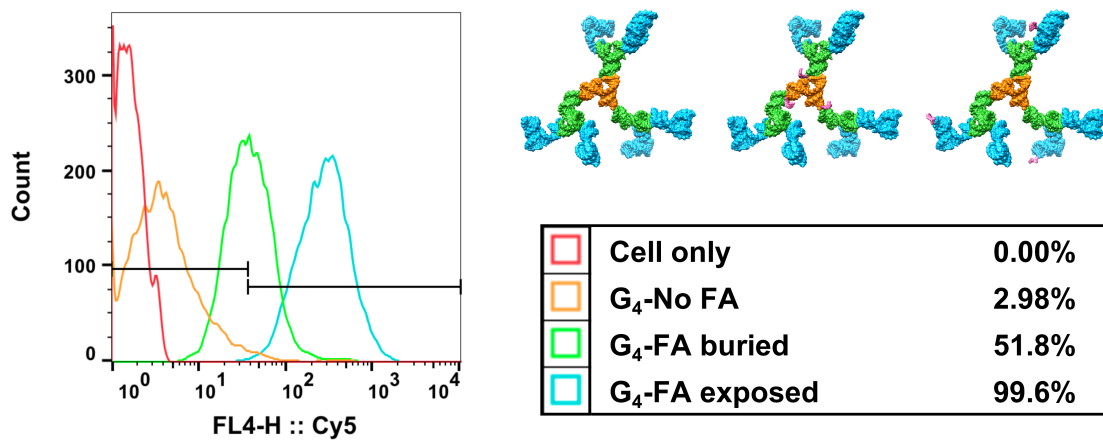

**Figure S4.** Shielding effect of RNA dendrimers using folate as model cargo demonstrated by flow cytometry.

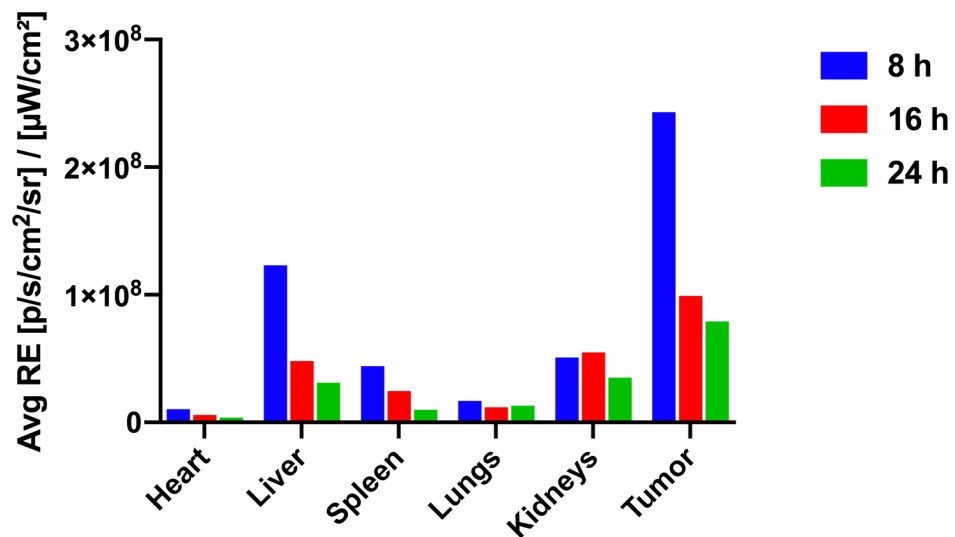

**Figure S5.** Quantitative analysis of biodistribution in tumors and vital organs derived from organ images in Figure 6 (Average Radiant Efficiency,  $[\text{p/s/cm}^2/\text{sr}] / [\mu\text{W/cm}^2]$ ).

**Table S1.** Summary of sequences used in RNA dendrimer construction.

|    | RNA Strand                               | Sequence                                                                         | Length (nt) | MW (g/mol) |
|----|------------------------------------------|----------------------------------------------------------------------------------|-------------|------------|
| 1  | H <sub>0</sub> -a/WT-b                   | 5'-<br>AUUCGCUGUGUGGUAGUGCCCACAUAUU<br>UGUUGAUCC-3'                              | 38          | 12099      |
| 2  | H <sub>0</sub> -b/WT-b                   | 5'-<br>CACUACCACUUUGUCCUACGCCACAUAUU<br>UUGUUGAUCC-3'                            | 40          | 12566      |
| 3  | H <sub>0</sub> -c/WT-b                   | 5'-<br>CGUAGGACCAGCGAAUCCCACAUAUUUG<br>UUGAUCC-3'                                | 36          | 11470      |
| 4  | H <sub>1</sub> -a/ H <sub>0</sub> -b     | 5'-<br>GCGUGCUGUGUGCUACCGCACUACCACUUU<br>GUCCUACG-3'                             | 38          | 12074      |
| 5  | H <sub>1</sub> -b/ H <sub>0</sub> -b     | 5'-<br>CGGUAGCACUUUGCUGUGCGCACUACCACU<br>UUGUCCUACG-3'                           | 40          | 12711      |
| 6  | H <sub>1</sub> -c/ H <sub>0</sub> -b     | 5'-<br>CGCACAGCCAGCACGCCACUACCACUUUGU<br>CCUACG-3'                               | 36          | 11407      |
| 7  | Ext-H <sub>1</sub> -a/ H <sub>0</sub> -b | 5'-<br>CCUAUUCAGGUGCGUGCUGUGUGCUACCG<br>AUGUAAUUCAACACUACCACUUUGUCCUA<br>CG-3'   | 60          | 19108      |
| 8  | Ext-H <sub>1</sub> -b/ H <sub>0</sub> -b | 5'-<br>UUGAAUUACAUCGGUAGCACUUUGCUGUG<br>CGAGGCUGAACAGCACUACCACUUUGUCCU<br>ACG-3' | 62          | 19841      |
| 9  | Ext-H <sub>1</sub> -c/ H <sub>0</sub> -b | 5'-<br>CUGUUCAGCCUCGCACAGCCAGCACGCACC<br>UGAAUAGGCACUACCACUUUGUCCUACG-3'         | 58          | 18471      |
| 10 | WT-b/H <sub>0</sub> -a                   | 5'-<br>CCCACAUAUUUGUUGAUCCAUUCGCUGU<br>GUGGUAGUG-3'                              | 38          | 12099      |
| 11 | WT-b/H <sub>0</sub> -c                   | 5'-<br>CCCACAUAUUUGUUGAUCCCGUAGGACCA<br>GCGAAU-3'                                | 36          | 11470      |
| 12 | 3WJ-WT-a                                 | 5'-UUGCCAUGUGUAUGUGGG-3'                                                         | 18          | 5784       |
| 13 | 3WJ-WT-b                                 | 5'-CCCACAUAUUUGUUGAUCC-3'                                                        | 20          | 6253       |
| 14 | 3WJ-WT-c                                 | 5'-GGAUCAAUCAUGGCAA-3'                                                           | 16          | 5140       |
| 15 | 3WJ-H <sub>0</sub> -a                    | 5'-AUUCGCUGUGUGGUAGUG-3'                                                         | 18          | 5784       |
| 16 | 3WJ-H <sub>0</sub> -b                    | 5'-CACUACCACUUUGUCCUACG-3'                                                       | 20          | 6252       |
| 17 | 3WJ-H <sub>0</sub> -c                    | 5'-CGUAGGACCAGCGAAU-3'                                                           | 16          | 5155       |
| 18 | 3WJ-H <sub>1</sub> -a                    | 5'-GCGUGCUGUGUGCUACCG-3'                                                         | 18          | 5760       |

|    |                                                    |                                                                                                                                      |    |       |
|----|----------------------------------------------------|--------------------------------------------------------------------------------------------------------------------------------------|----|-------|
| 19 | 3WJ-H <sub>1</sub> -b                              | 5'-CGGUAGCACUUUGCUGUGCG-3'                                                                                                           | 20 | 6398  |
| 20 | 3WJ-H <sub>1</sub> -c                              | 5'-CGCACAGCCAGCACGC-3'                                                                                                               | 16 | 5093  |
| 21 | Ext-H <sub>1</sub> -a/H <sub>0</sub> -b_<br>6 ALKs | <u>5</u> '-<br>CCUAU <u>U</u> CAGG <u>U</u> GCGUGCUGUGUCUAC <u>C</u> G<br>AUG <u>U</u> AAU <u>U</u> CAACACUACCACUUUGUCCUA<br>CG-3'   | 60 | 19284 |
| 22 | Ext-H <sub>1</sub> -b/H <sub>0</sub> -b_<br>6 ALKs | <u>5</u> '-<br>UUGAA <u>U</u> UACA <u>U</u> CGGUAGCACUUUGCUGUG<br><u>C</u> GAGG <u>C</u> UGAA <u>C</u> AGCACUACCACUUUGUCCU<br>ACG-3' | 62 | 20017 |
| 23 | Ext-H <sub>1</sub> -c/H <sub>0</sub> -b_<br>6 ALKs | 5'-<br><u>C</u> UGU <u>U</u> CAGCC <u>U</u> CGCACAGCCAGCAC <u>C</u> GCACC<br>UGAA <u>U</u> AGGCACUACCACUUUGUCCUACG-3'                | 58 | 18585 |

---

All C and U are 2'-fluoro modified. All 5', C and U are 2'-O-propargyl modified.

**Table S2.** Summary of RNA dendrimers characteristics.

|   | RNA nanoparticle           | Strand Type | Strand Amount | Nucleotide Amount | Terminal Ends | Size (nm) | T <sub>m</sub> (°C) | T <sub>a</sub> (°C) | MW (g/mol) |
|---|----------------------------|-------------|---------------|-------------------|---------------|-----------|---------------------|---------------------|------------|
| 1 | 3WJ-WT                     | 3           | 3             | 54                | 3             | N/A       | 54.8                | 63.5                | 17177      |
| 2 | 3WJ-H <sub>0</sub>         | 3           | 3             | 54                | 3             | N/A       | 61.7                | 67.2                | 17191      |
| 3 | 3WJ-H <sub>1</sub>         | 3           | 3             | 54                | 3             | N/A       | 68.5                | 74.4                | 17251      |
| 4 | G <sub>3</sub> -1          | 5           | 9             | 216               | 6             | 7.98      | 52.0                | 72.3                | 68908      |
| 5 | G <sub>3</sub> -2          | 5           | 9             | 216               | 6             | 8.39      | 58.3                | 79.4                | 69010      |
| 6 | Ext-G <sub>3</sub>         | 5           | 9             | 282               | 6             | 10.38     | 59.7                | N/A                 | 90238      |
| 7 | G <sub>4</sub>             | 7           | 21            | 540               | 12            | 13.12     | 52.6                | 76.5                | 172444     |
| 8 | Ext-G <sub>4</sub>         | 7           | 21            | 606               | 12            | 14.24     | 53.6                | 95.0                | 193672     |
| 9 | Ext-G <sub>4</sub> -FA-PTX | 7           | 21            | 606               | 12            | 17.90     | 53.4                | N/A                 | 217780     |
